# Supplementary material for: Inhibition of Fried Meat-Induced Colorectal DNA Damage and Altered Systemic Genotoxicity in Humans by Crucifera, Chlorophyllin, and Yogurt
Source: PLoS One. 2011 Apr 25;6(4):e18707. doi: 10.1371/journal.pone.0018707 (PMC3081825; doi:10.1371/journal.pone.0018707)
Supplement: File S1 — Data from mutagenicity and comet assay experiments. (DOC) [file pone.0018707.s001.doc]

**Supplementary Material**

Table S1 - Meat Mutagenicity

| Mutagenicity of meat extracts in *S. typhimurium* TA98 (pilot study) | | | | | | | | |
| --- | --- | --- | --- | --- | --- | --- | --- | --- |
|  |  |  |  |  |  |  |  |  |
|  | Beef | LTa |  | Beef | HTb |  | Beef | HTb |
|  | Exp 1 |  |  | Exp 1 |  |  | Exp 2 |  |
|  | g-eq./plate |  |  | g-eq./plate |  |  | g-eq./plate |  |
|  | 0 | **28c** |  | 0 | **36** |  | 0 | **36** |
|  | 0.003 | **22** |  | 0.003 | **46** |  | 0.003 | **49** |
|  | 0.006 | **26** |  | 0.005 | **54** |  | 0.005 | **67** |
|  | 0.030 | **31** |  | 0.026 | **80** |  | 0.026 | **95** |
|  | 0.06 | **32** |  | 0.051 | **120** |  | 0.051 | **137** |
|  | 0.152 | **28** |  | 0.128 | **256** |  | 0.128 | **222** |
|  | 0.303 | **20** |  | 0.252 | **367** |  | 0.252 | **323** |
|  | 0.606 | **36** |  | 0.512 | **605** |  | 0.512 | **515** |
|  |  |  |  |  |  |  |  |  |
|  | Beef | HTb |  | Sausage | HTb |  | Bacon | HTb |
|  | Exp 3 |  |  | Exp 1 |  |  | Exp 1 |  |
|  | g-eq./plate |  |  | g-eq./plate |  |  | g-eq./plate |  |
|  | 0 | **36** |  | 0 | **28** |  | 0 | **28** |
|  | 0.003 | **48** |  | 0.003 | **34** |  | 0.001 | **21** |
|  | 0.005 | **60** |  | 0.006 | **39** |  | 0.002 | **38** |
|  | 0.027 | **88** |  | 0.030 | **43** |  | 0.011 | **75** |
|  | 0.054 | **129** |  | 0.059 | **82** |  | 0.022 | **100** |
|  | 0.135 | **239** |  | 0.148 | **169** |  | 0.055 | **234** |
|  | 0.269 | **345** |  | 0.295 | 218 |  | 0.110 | 246 |
|  | 0.538 | **560** |  | 0.59 | 295 |  | 0.219 | 374 |

aBeef patties were cooked at 100°C for 10 min on each side.

bBeef, sausage, and bacon were cooked at 250°C for 11 min on each side.

cCounts designated as within the linear portion of the dose-response curve are in bold. Counts for control (0 g-eq./plate) plates are the average of 3 separate plates. All other concentrations were tested in single plates.

Table S1 - continued

| Mutagenicity of meat extracts in *S. typhimurium* YG1024 (pilot study) | | | | | | | | |
| --- | --- | --- | --- | --- | --- | --- | --- | --- |
|  |  |  |  |  |  |  |  |  |
|  | Beef | LTa |  | Beef | HTb |  | Beef | HTb |
|  | Exp 1 d |  |  | Exp 1d |  |  | Exp 2 d |  |
|  | g-eq./plate |  |  | g-eq./plate |  |  | g-eq./plate |  |
|  | 0 | **37** c |  | 0 | **79** |  | 0 | **79** |
|  | 0.003 | **20** |  | 0.003 | **86** |  | 0.003 | **114** |
|  | 0.006 | **33** |  | 0.005 | **151** |  | 0.005 | **134** |
|  | 0.030 | **48** |  | 0.026 | **428** |  | 0.026 | **374** |
|  | 0.06 | **42** |  | 0.051 | **842** |  | 0.051 | **557** |
|  | 0.152 | **52** |  | 0.128 | **1451** |  | 0.128 | **1148** |
|  | 0.303 | **47** |  | 0.252 | 2061 |  | 0.252 | 1564 |
|  | 0.606 | **30** |  | 0.512 | 2764 |  | 0.512 | 1848 |
|  |  |  |  |  |  |  |  |  |
|  | Beef | HTb |  | Sausage | HTb |  | Bacon | HTb |
|  | Exp 3 d |  |  | Exp 1 d |  |  | Exp 1d |  |
|  | g-eq./plate |  |  | g-eq./plate |  |  | g-eq./plate |  |
|  | 0 | **79** |  | Beef | **37** |  | 0 | **37** |
|  | 0.003 | **100** |  | 0.003 | **63** |  | 0.001 | **92** |
|  | 0.005 | **143** |  | 0.006 | **96** |  | 0.002 | **123** |
|  | 0.027 | **401** |  | 0.030 | **329** |  | 0.011 | **522** |
|  | 0.054 | **700** |  | 0.059 | **459** |  | 0.022 | **664** |
|  | 0.135 | **1300** |  | 0.148 | **1003** |  | 0.055 | **1375** |
|  | 0.269 | 1813 |  | 0.295 | 1475 |  | 0.110 | 1771 |
|  | 0.538 | 2306 |  | 0.59 | 1680 |  | 0.219 | 2446 |
|  |  |  |  |  |  |  |  |  |

aBeef patties were cooked at 100°C for 10 min on each side.

bBeef, sausage, and bacon were cooked at 250°C for 11 min on each side.

cCounts designated as within the linear portion of the dose-response curve are in bold. Counts for control (0 g-eq./plate) plates are the average of 3 separate plates. All other concentrations were tested in single plates.

Table S1 - continued

| Mutagenicity of meat extracts in *S. typhimurium*YG1041 (pilot study) | | | | | | | | |
| --- | --- | --- | --- | --- | --- | --- | --- | --- |
|  |  |  |  |  |  |  |  |  |
|  | Beef | LTa |  | Beef | HTb |  |  |  |
|  | Exp 1 |  |  | Exp 1 |  |  |  |  |
|  | g-eq./plate |  |  | g-eq./plate |  |  |  |  |
|  | 0 | **62**c |  | 0 | **61** |  |  |  |
|  | 0.003 | **59** |  | 0.003 | **115d** |  |  |  |
|  | 0.006 | **69** |  | 0.005 | **99d** |  |  |  |
|  | 0.030 | **64** |  | 0.026 | **337d** |  |  |  |
|  | 0.06 | **67** |  | 0.057 | **555d** |  |  |  |
|  | 0.152 | **75** |  | 0.128 | **1156d** |  |  |  |
|  | 0.303 | **65** |  |  |  |  |  |  |
|  | 0.606 | **69** |  |  |  |  |  |  |
|  |  |  |  |  |  |  |  |  |
|  | Sausage | HTb |  | Bacon | HTb |  |  |  |
|  | Exp 1 |  |  | Exp 1 |  |  |  |  |
|  | g-eq./plate |  |  | g-eq./plate |  |  |  |  |
|  | 0 | **62** |  | 0 | **62** |  |  |  |
|  | 0.003 | **82** |  | 0.001 | **95** |  |  |  |
|  | 0.006 | **84** |  | 0.002 | **125** |  |  |  |
|  | 0.030 | **256** |  | 0.011 | **348** |  |  |  |
|  | 0.059 | **349** |  | 0.022 | **432** |  |  |  |
|  | 0.148 | **802** |  | 0.055 | **967** |  |  |  |
|  | 0.295 | **920** |  | 0.110 | 1338 |  |  |  |
|  | 0.59 | **1438** |  | 0.219 | 1572 |  |  |  |

aBeef patties were cooked at 100°C for 10 min on each side.

bBeef ,sausage and bacon were cooked at 250°C for 11 min on each side.

cCounts designated as within the linear portion of the dose-response curve are in bold. Counts for control (0 g-eq./plate) plates are the average of 3 separate plates. All other concentrations were tested in single plates except where noted.

dCounts are the average of two plates.

Table S1 - continued

| Mutagenicity of meat extracts in *S. typhimurium*YG1024 (feeding study) | | | | | | | | |
| --- | --- | --- | --- | --- | --- | --- | --- | --- |
|  |  |  |  |  |  |  |  |  |
|  | Beef | HTb |  | Beef | HTb |  | Beef | HTb |
|  | Exp 1 |  |  | Exp 2 |  |  | Exp 3 |  |
|  | g-eq./plate |  |  | g-eq./plate |  |  | g-eq./plate |  |
|  | 0 | **52** |  | 0 | **52** |  | 0 | **48** |
|  | 0.003 | **45** |  | 0.003 | **63** |  | 0.003 | **67** |
|  | 0.006 | **72** |  | 0.006 | **62** |  | 0.006 | **103** |
|  | 0.015 | **118** |  | 0.015 | **159** |  | 0.03 | **323** |
|  | 0.03 | **418** |  | 0.03 | **301** |  | 0.06 | **468** |
|  | 0.06 | **485** |  | 0.06 | **601** |  | 0.15 | **1140** |
|  |  |  |  |  |  |  | 0.30 | 1301 |
|  |  |  |  |  |  |  | 0.60 | 1564 |
|  |  |  |  |  |  |  |  |  |
|  | Beef | HTb |  | Sausage | HTb |  | Sausage | HTb |
|  | Exp 4 |  |  | Exp 1 |  |  | Exp2 |  |
|  | g-eq./plate |  |  | g-eq./plate |  |  | g-eq./plate |  |
|  | 0 | **45d** |  | 0 | **52** |  | 0 | **52** |
|  | 0.003 | **98d** |  | 0.003 | **63** |  | 0.003 | **58** |
|  | 0.006 | **164d** |  | 0.006 | **56** |  | 0.006 | **90** |
|  | 0.03 | **669d** |  | 0.015 | **136** |  | 0.015 | **155** |
|  | 0.06 | **1153d** |  | 0.03 | **301** |  | 0.03 | **360** |
|  | 0.15 | 2046d |  | 0.06 | **437** |  | 0.06 | **583** |
|  | 0.30 | 2751d |  |  |  |  |  |  |
|  | 0.60 | 3223d |  |  |  |  |  |  |
|  |  |  |  |  |  |  |  |  |
|  | Sausage | HTb |  | Sausage | HTb |  |  |  |
|  | Exp3 |  |  | Exp 4 |  |  |  |  |
|  | g-eq./plate |  |  | g-eq./plate |  |  |  |  |
|  | 0 | **48** |  | 0 | **45** c |  |  |  |
|  | 0.003 | **65** |  | 0.003 | **113d** |  |  |  |
|  | 0.006 | **90** |  | 0.006 | **182 d** |  |  |  |
|  | 0.03 | **245** |  | 0.03 | **593 d** |  |  |  |
|  | 0.06 | **375** |  | 0.06 | **1024 d** |  |  |  |
|  | 0.15 | **732** |  | 0.15 | 1911 **d** |  |  |  |
|  | 0.30 | 890 |  | 0.30 | 2685 **d** |  |  |  |
|  | 0.60 | 1085 |  | 0.60 | 3207 **d** |  |  |  |

aBeef patties were cooked at 100°C for 10 min on each side.

bBeef ,sausage and bacon were cooked at 250°C for 11 min on each side.

cCounts designated as within the linear portion of the dose-response curve are in bold. Counts for control (0 ml-eq./plate) plates are the average of 3 separate plates. All other concentrations were tested in single plates except where noted.

dCounts are the average of two plates.

Table S2

| Urine mutagenicity after consumption of the meal containing meat fried at low temperaturea | | | | | | | | | | | |
| --- | --- | --- | --- | --- | --- | --- | --- | --- | --- | --- | --- |
| Sample ID: | #1b | week 1 |  | #1 | week 2 |  | #2 | week 3 |  | #2 | week 4 |
| ml-eq./plate | U | H |  | U | H |  | U | H |  | U | H |
| 0 | **48**d | **48** |  | **48** | **48** |  | **48** | **48** |  | **48** | **48** |
| 0.3 | **50** | **71** |  | **53** | **56** |  | **52** | **290** |  | **58** | **94** |
| 0.75 | **53** | **86** |  | **56** | **74** |  | **55** | **447** |  | **63** | **99** |
| 1.5 | **62** | **96** |  | **61** | 56 |  | **77** | **561** |  | **69** | 96 |
| 3 | **84** | 37 |  | **87** | 32 |  | **90** | 287 |  | **103** | 89 |
| 6 | **136** | 15 |  | **91** | 39 |  | **99** | 508 |  | **128** | 57 |
|  |  |  |  |  |  |  |  |  |  |  |  |
|  | #3 | week 1 |  | #3 | week 2 |  | #4 | week 3 |  | #4 | week 4 |
| ml-eq./plate | U | H |  | U | H |  | U | H |  | U | H |
| 0 | **48** | **48** |  | **48** | no data |  | **48** | **48** |  | **48** | **48** |
| 0.3 | **48** | **88** |  | **55** |  |  | **60** | **71** |  | **47** | **70** |
| 0.75 | **41** | **131** |  | **43** |  |  | **60** | **88** |  | **65** | **73** |
| 1.5 | **44** | **185** |  | **60** |  |  | **55** | **107** |  | **55** | **101** |
| 3 | **65** | **352** |  | **67** |  |  | **55** | **250** |  | **83** | **165** |
| 6 | **98** | 190 |  | **66** |  |  | **93** | 315 |  | **80** | **205** |
|  |  |  |  |  |  |  |  |  |  |  |  |
|  | #5 | week 1 |  | #5 | week 2 |  | #6 | week 1 |  | #6 | week 2 |
| ml-eq./plate | U | H |  | U | H |  | U | H |  | U | H |
| 0 | **62c** | **62** |  | **58** | **50** |  | **58** | **58** |  | **62** | **62** |
| 0.03 |  |  |  |  |  |  |  | **61** |  |  |  |
| 0.075 |  |  |  |  |  |  |  | **72** |  |  |  |
| 0.15 |  |  |  |  |  |  |  | **70** |  |  |  |
| 0.3 | **86** | **91** |  | **74** | **65** |  | **77** | **107** |  | **68** | **94** |
| 0.75 | **104** | **104** |  | **90** | **90** |  | **132** | 105 |  | **109** | **126** |
| 1.5 | **134** | 101 |  | **134** | 79 |  | **218** |  |  | **266** | 143 |
| 3 | **230** | 98 |  | **227** |  |  | **368** |  |  | **440** | 126 |
| 6 | **349** | 68 |  | **415** |  |  | **718** |  |  | **718** | 67 |
|  |  |  |  |  |  |  |  |  |  |  |  |
|  | #7b | week 3 |  | #7 | week 4 |  | #8 | week 3 |  | #8 | week 4 |
| ml-eq./plate | U | H |  | U | H |  | U | H |  | U | H |
| 0 | **62** | **62** |  | **62** | **62** |  | **62** | **62** |  | **58** | **58** |
| 0.03 |  |  |  |  |  |  |  |  |  | **54** | **56** |
| 0.075 |  |  |  |  |  |  |  |  |  | **63** | **61** |
| 0.15 |  |  |  |  |  |  |  |  |  | **64** | **84** |
| 0.3 | **85** | **63** |  | **67** | **87** |  | **66** | **87** |  | **49** | **110** |
| 0.75 | **82** | **102** |  | **69** | **130** |  | **57** | **73** |  | **65** | **133** |
| 1.5 | **78** | **186** |  | **93** | **133** |  | **84** | **107** |  |  |  |
| 3 | **134** | **314** |  | **144** | 90 |  | **98** | 36 |  |  |  |
| 6 | **182** | 222 |  | **178** | 77 |  | **119** | 39 |  |  |  |

aBeef and sausage patties were cooked at 100°C for 10 min on each side.

bIndicates subject number. Subjects consumed diets containing meat cooked at either low or high temperature for 2-week periods in a cross-over design.

cUrine was tested at lower concentrations when higher concentrations were toxic. Counts for control (0 ml-eq./plate) plates are the average of 3 separate plates. All other concentrations were tested in single plates.

dCounts designated as within the linear portion of the dose-response curve are in bold type. Assays with the same zero dose mean count were conducted on the same day.U = unhydrolyzed extracts H = acid-hydroylzed extracts

Table S3

| Urine Mutagenicity after consumption of the meal containing meat fried at high temperaturea | | | | | | | | | | | |
| --- | --- | --- | --- | --- | --- | --- | --- | --- | --- | --- | --- |
| Sample ID: | #1b | week 3 |  | #1 | week 4 |  | #2 | week 1 |  | #2 | week 2 |
| ml-eq./plate | U | H |  | U | H |  | U | H |  | U | H |
| 0 | **48** d | **48** |  | **48** | **48** |  | **48** | **48** |  | **48** | **48** |
| 0.3 | **70** | **120** |  | **90** | **106** |  | **70** | **269** |  | **72** | **1315** |
| 0.75 | **73** | **155** |  | **109** | **101** |  | **102** | **350** |  | **90** | **1586** |
| 1.5 | **79** | **218** |  | **165** | 64 |  | **142** | **480** |  | **150** | **2445** |
| 3 | **187** | 245 |  | **281** | 29 |  | **400** | 427 |  | **372** | 2103 |
| 6 | **290** | 146 |  | 376 | 25 |  | **518** | 147 |  | 415 | 1516 |
|  |  |  |  |  |  |  |  |  |  |  |  |
| Sample ID: | #3 | week 3 |  | #3 | week 4 |  | #4 | week 1 |  | #4 | week 2 |
| ml-eq./plate | U | H |  | U | H |  | U | H |  | U | H |
| 0 | **48** | **48** |  | **48** | **48** |  | **48** | **48** |  | **48** | **48** |
| 0.3 | **85** | **270** |  | **110** | **265** |  | **55** | **155** |  | **56** | **230** |
| 0.75 | **110** | **428** |  | **165** | **377** |  | **62** | **209** |  | **64** | **633** |
| 1.5 | **111** | 606 |  | **301** | 410 |  | **78** | 240 |  | **90** | 898 |
| 3 | **430** | 267 |  | **670** | 116 |  | **259** | 113 |  | **197** | 633 |
| 6 | **737** | 81 |  | **858** | 74 |  | 238 | 82 |  | **278** | 230 |
|  |  |  |  |  |  |  |  |  |  |  |  |
| Sample ID: | #5b | week 3 |  | #5 | week 4 |  | #6 | week 3 |  | #6 | week 4 |
| ml-eq./plate | U | H |  | U | H |  | U | H |  | U | H |
| 0 | **62** d | **50** |  | **62** | **62** |  | **58** | **58** |  | **62** | **62** |
| 0.03 |  |  |  |  |  |  | **80** | **55** |  |  |  |
| 0.075 |  |  |  |  |  |  | **78** | **137** |  |  |  |
| 0.15 |  | **65** |  |  |  |  | **176** | **186** |  |  |  |
| 0.3 | **31** | **81** |  | **118** | **381** |  | **200** | 237 |  | **44** | **492** |
| 0.75 | **30** | **102** |  | **148** | **449** |  |  | 155 |  | **41** | **620** |
| 1.5 | **107** | 126 |  | **219** | 410 |  |  |  |  | **391** | 452 |
| 3 | **155** |  |  | **558** | 145 |  |  |  |  | **999** | 97 |
| 6 | **237** |  |  | **804** | 75 |  |  |  |  | 885 | 70 |
|  |  |  |  |  |  |  |  |  |  |  |  |
| Sample ID: | #7 | week 1 |  | #7 | week 2 |  | #8 | week 1 |  | #8 | week 2 |
| ml-eq./plate | U | H |  | U | H |  | U | H |  | U | H |
| 0 | **62** | **62** |  | **62** | **62** |  | **62** | **58** |  | **62** | **58** |
| 0.03 |  |  |  |  |  |  |  | **64** |  |  | **61** |
| 0.075 |  |  |  |  |  |  |  | **102** |  |  | **97** |
| 0.15 |  |  |  |  |  |  |  | **131** |  |  | **64** |
| 0.3 | **50** | **323** |  | **86** | **312** |  | **68** | **209** |  | **61** | **127** |
| 0.75 | **58** | **604** |  | **77** | **599** |  | **88** | 216 |  | **66** | **156** |
| 1.5 | **76** | 820 |  | **84** | 570 |  | **70** |  |  | **67** |  |
| 3 | **84** | 729 |  | **137** | 463 |  | **88** |  |  | **80** |  |
| 6 | **99** | 239 |  | **156** |  |  | **133** |  |  | **114** |  |

Table S3 – continued

| Urine mutagenicity after consumption of the meal containing meat fried at high temperaturea | | | | | | | | | | | |
| --- | --- | --- | --- | --- | --- | --- | --- | --- | --- | --- | --- |
| Sample ID: | #9b | week 1 |  | #9 | week 2 |  | #10 | week 1 |  | #10 | week 2 |
| ml-eq./plate | U | H |  | U | H |  | U | H |  | U | H |
| 0 | **62** d | **62** |  | **62** | **62** |  | **62** | **62** |  | **62** | **62** |
| 0.03 |  |  |  |  | **177** |  |  |  |  |  |  |
| 0.075 |  |  |  |  | **268** |  |  |  |  |  |  |
| 0.15 |  |  |  |  | 254 |  |  |  |  |  |  |
| 0.3 | **89** | **159** |  | **127** | 111 |  | **91** | **141** |  | **98** | **214** |
| 0.75 | **84** | **296** |  | **99** | 136 |  | **123** | **200** |  | **126** | **297** |
| 1.5 | **113** | 402 |  | **156** |  |  | **171** | 131 |  | **178** | 231 |
| 3 | **183** | 404 |  | **227** |  |  | **320** | 114 |  | **304** | 129 |
| 6 | **244** | 181 |  | **376** |  |  | **498** | 132 |  | **597** | 109 |
|  |  |  |  |  |  |  |  |  |  | |  |
| Sample ID: | #11 | week 3 |  | #11 | week 4 |  | #12 | week 3 |  | #12 | week 4 |
| ml-eq./plate | U | H |  | U | H |  | U | H |  | U | H |
| 0 | **62** | **62** |  | **62** | **62** |  | **62** | **62** |  | **62** | **62** |
| 0.3 | **106** | **295** |  | **130** | **331** |  | **101** | **226** |  | **88** | **199** |
| 0.75 | **205** | **299** |  | **204** | **372** |  | **115** | **222** |  | **110** | **223** |
| 1.5 | **330** | 122 |  | **291** | 314 |  | **186** | 113 |  | **185** | 125 |
| 3 | **742** | 101 |  | **741** | 106 |  | **415** | 74 |  | **404** | 94 |
| 6 | 806 | 109 |  | 914 | 97 |  | **540** | 51 |  | **510** | 65 |
| Sample ID: | #13 | week 1 |  | #13 | week 2 |  | #14 | week 1 |  | #14 | week 2 |
| ml-eq./plate | U | H |  | U | H |  | U | H |  | U | H |
| 0 | **64** c | **64** |  | **64** | **64** |  | **53** | **53** |  | **53** | **53** |
| 0.15 |  |  |  |  |  |  |  | **120** |  |  | **71** |
| 0.3 | **70** | **276** |  | **108** | **428** |  | **72** | **218** |  |  | **125** |
| 0.75 | **101** | **492** |  | **144** | **738** |  | **75** | **515** |  | **96** | **193** |
| 1.5 | **160** | 507 |  | **248** | 667 |  | **119** | **556** |  | **147** | **376** |
| 3 | **343** | 137 |  | **520** | 252 |  | **271** | **1636** |  | **390** | 394 |
| 6 | 285 | 79 |  | **756** | 63 |  | **381** |  |  | 479 |  |
|  |  |  |  |  |  |  |  |  |  |  |  |
| Sample ID: | #15b | week 3 |  | #15 | week 4 |  | #16 | week 3 |  | #16 | week 4 |
| ml-eq./plate | U | H |  | U | H |  | U | H |  | U | H |
| 0 | **53** d | **53** |  | **53** | **53** |  | **64** | **64** |  | **64** | **64** |
| 0.075 |  |  |  |  | **136** |  |  |  |  |  |  |
| 0.15 |  | **110** |  |  | **176** |  |  |  |  |  |  |
| 0.3 | **100** | **307** |  | **80** | **265** |  | **97** | **248** |  | **83** | **235** |
| 0.75 | **165** | 399 |  | **154** | **388** |  | **103** | **330** |  | **111** | **257** |
| 1.5 |  | 422 |  |  | 350 |  | **218** | 226 |  | **143** | 187 |
| 3 |  |  |  |  |  |  | **472** | 79 |  | **299** | 106 |
| 6 | **870** |  |  | 570 |  |  | **552** | 52 |  | **421** | 421 |

aBeef and sausage patties were cooked at 250°C for 11 min on each side.

bIndicates subject number. Subjects consumed diets containing meat cooked at high temperature alone or with inhibitors for 2-week periods in a cross-over design.

cUrine was tested at lower concentrations when higher concentrations were toxic. Counts for control (0 ml-eq./plate) plates are the average of 3 separate plates. All other concentrations were tested in single plates.

dCounts designated as within the linear portion of the dose-response curve are in bold type.

U = unhydrolyzed extracts H = acid-hydroylzed extracts

Table S4

| Urine mutagenicity after consumption of the meal containing meat fried at high temperaturea together with dietary inhibitorsb | | | | | | | | | | | |
| --- | --- | --- | --- | --- | --- | --- | --- | --- | --- | --- | --- |
| Sample ID: | #9c | week 3 |  | #9 | week 4 |  | #10 | week 3 |  | #10 | week 4 |
| ml-eq./plate | U | H |  | U | H |  | U | H |  | U | H |
| 0 | **62** c | **62d** |  | **62** | **62** |  | **58** | **58** |  | **58** | **58** |
| 0.03 |  |  |  |  |  |  |  | **39** |  |  | **110** |
| 0.075 |  |  |  |  |  |  |  | **126** |  |  | **158** |
| 0.15 |  |  |  |  |  |  |  | **172** |  | **80** | **130** |
| 0.3 | **91** | **220** |  | **69** | **512** |  | **0** | **235** |  | **108** | **223** |
| 0.75 | **94** | **289** |  | **93** | **930** |  | **71** | 84 |  | **187** | 312 |
| 1.5 | **169** | 384 |  | **122** | 1305 |  | **89** |  |  | 150 |  |
| 3 | **394** | 207 |  | **280** | 1962 |  | **277** |  |  |  |  |
| 6 | **555** | 325 |  | **364** | 1981 |  |  |  |  |  |  |
|  |  |  |  |  |  |  |  |  |  |  |  |
| Sample ID: | #11 | week 1 |  | #11 | week 2 |  | #12 | week 1 |  | #12 | week 2 |
| ml-eq./plate | U | H |  | U | H |  | U | H |  | U | H |
| 0 | **58** | **58** |  | **58** | **58** |  | **58** | **58** |  | **58** | **58** |
| 0.03 |  | **75** |  |  | **80** |  |  | **65** |  |  | **65** |
| 0.075 |  | **107** |  |  | **116** |  |  | **85** |  |  | **83** |
| 0.15 |  | **131** |  |  | **159** |  |  | **123** |  |  | **136** |
| 0.3 | **63** | **225** |  |  | **271** |  | **68** | 125 |  |  | 136 |
| 0.75 | **92** | 301 |  |  | 145 |  | **75** | 165 |  | **96** | 168 |
| 1.5 | **160** |  |  | **189** |  |  | **90** |  |  | **127** |  |
| 3 | **299** |  |  | **392** |  |  | **165** |  |  | **269** |  |
| 6 | **475** |  |  | 79 |  |  | **254** |  |  | **460** |  |
| 7.5 |  |  |  | 127 |  |  |  |  |  |  |  |
|  |  |  |  |  |  |  |  |  |  |  |  |
| Sample ID: | #13 | week 3 |  | #13 | week 4 |  |  |  |  |  |  |
| ml-eq./plate | U | H |  | U | H |  |  |  |  |  |  |
| 0 | **53** | **53** |  | **53** | **53** |  |  |  |  |  |  |
| 0.075 |  |  |  |  | **192** |  |  |  |  |  |  |
| 0.15 |  | **177** |  |  | **291** |  |  |  |  |  |  |
| 0.3 | **84** | **337** |  |  | **762** |  |  |  |  |  |  |
| 0.75 | **114** | 538 |  | **88** | **1495** |  |  |  |  |  |  |
| 1.5 | **226** | 581 |  | **150** | 1950 |  |  |  |  |  |  |
| 3 | **521** |  |  | **334** |  |  |  |  |  |  |  |
| 6 | **644** |  |  | **535** |  |  |  |  |  |  |  |

Table S4 – continued

Urine mutagenicity after consumption of the meal containing meat fried at high temperaturea together with dietary inhibitorsb

| Sample ID: | #14 c | week 3 |  | #14 | week 4 |  |  |  |
| --- | --- | --- | --- | --- | --- | --- | --- | --- |
| ml-eq./plate | U | H |  | U | H |  |  |  |
| 0 | **53** d | **53** |  | **53** | **53** |  |  |  |
| 0.15 |  | **151** |  |  | **155** |  |  |  |
| 0.3 |  | **223** |  |  | **266** |  |  |  |
| 0.75 | **88** | 347 |  | **118** | 351 |  |  |  |
| 1.5 | **87** | 434 |  | **141** | 400 |  |  |  |
| 3 | **349** | 523 |  | **268** |  |  |  |  |
| 6 | **423** |  |  | **485** |  |  |  |  |
|  |  |  |  |  |  |  |  |  |
| Sample ID: | #15 | week 1 |  | #15 | week 2 |  |  |  |
| ml-eq./plate | U | H |  | U | H |  |  |  |
| 0 | **53c** | **53** |  | **53** | **53** |  |  |  |
| 0.075 |  | **119** |  |  | **57** |  |  |  |
| 0.15 |  | **241** |  |  | **133** |  |  |  |
| 0.3 | **33** | **681** |  | **82** | **199** |  |  |  |
| 0.75 | **44** | 1096 |  | **150** | 276 |  |  |  |
| 1.5 | **63** | 1005 |  |  | 411 |  |  |  |
| 3 | **141** |  |  |  |  |  |  |  |
| 6 | **181** |  |  | **494** |  |  |  |  |
|  |  |  |  |  |  |  |  |  |
| Sample ID: | #16 | week 1 |  | #16 | week 2 |  |  |  |
| ml-eq./plate | U | H |  | U | H |  |  |  |
| 0 | **53** | **53** |  | **53** | **53** |  |  |  |
| 0.15 |  | **106** |  |  | **76** |  |  |  |
| 0.3 |  | **228** |  | **77** | **141** |  |  |  |
| 0.75 | **93** | 159 |  | **98** | **218** |  |  |  |
| 1.5 |  | 279 |  |  | 238 |  |  |  |
| 6 | **432** |  |  | 291 |  |  |  |  |

aBeef and sausage patties were cooked at 250°C for 11 min on each side.

bDietary inhibitors were cruciferous vegetables, yogurt, and chlorophyllin tablets.

cIndicates subject number. Subjects consumed diets containing meat cooked at high

temperature alone or with inhibitors for 2-week periods in a cross-over design. Counts for control (0

ml-eq./plate) plates are the average of 3 separate plates. All other concentrations were tested in single plates.

dCounts designated as within the linear portion of the dose-response curve are in bold type

U = unhydrolyzed extracts H = acid-hydroylzed extracts

Table S5

Urine creatinine values (µmoles/ml)a

|  |  |  |  |  |  |  |  |  |
| --- | --- | --- | --- | --- | --- | --- | --- | --- |

| Sample ID: |  |  |  |  |  |  |  |
| --- | --- | --- | --- | --- | --- | --- | --- |
| #1 week 1 | 10.29 | #5 week 1 | 10.19 | #9 week 1 | 12.59 | #13 week 1 | 15.26 |
| #1 week 2 | 9.64 | #5 week 2 | 12.33 | #9 week 2 | 13.27 | #13 week 2 | 20.19 |
| #1 week 3 | 10.85 | #5 week 3 | 14.44 | #9 week 3 | 14.30 | #13 week 3 | 4.99 |
| #1 week 4 | 9.67 | #5 week 4 | 12.55 | #9 week 4 | 17.29 | #13 week 4 | 12.73 |
| #2 week 1 | 12.74 | #6 week 1 | 19.81 | #10 week 1 | 10.62 | #14 week 1 | 10.57 |
| #2 week 2 | 17.35 | #6 week 2 | 20.57 | #10 week 2 | 13.66 | #14 week 2 | 7.83 |
| #2 week 3 | 14.58 | #6 week 3 | 13.66 | #10 week 3 | 11.71 | #14 week 3 | 9.13 |
| #2 week 4 | 12.93 | #6 week 4 | 15.37 | #10 week 4 | 18.98 | #14 week 4 | 11.54 |
| #3 week 1 | 11.07 | #7 week 1 | 24.25 | #11 week 1 | 11.20 | #15 week 1 | 16.12 |
| #3 week 2 | 15.75 | #7 week 2 | 26.09 | #11 week 2 | 15.13 | #15 week 2 | 10.68 |
| #3 week 3 | 11.84 | #7 week 3 | 21.67 | #11 week 3 | 17.23 | #15 week 3 | 8.25 |
| #3 week 4 | 13.59 | #7 week 4 | 14.73 | #11 week 4 | 16.77 | #15 week 4 | 12.22 |
| #4 week 1 | 9.13 | #8 week 1 | 6.06 | #12 week 1 | 7.77 | #16 week 1 | 14.57 |
| #4 week 2 | 11.47 | #8 week 2 | 6.74 | #12 week 2 | 8.41 | #16 week 2 | 13.68 |
| #4 week 3 | 6.36 | #8 week 3 | 10.51 | #12 week 3 | 5.99 | #16 week 3 | 13.24 |
| #4 week 4 | 8.01 | #8 week 4 | 9.18 | #12 week 4 | 8.11 | #16 week 4 | 6.63 |

|  | | |  | |  |  |  |  |  |  |
| --- | --- | --- | --- | --- | --- | --- | --- | --- | --- | --- |
| a To estimate mutagenic potency for urine as rev/µmoles creatinine, we fit models using doses expressed in µmoles creatinine. These doses were calculated by multiplying the dose value in ml-eq/plate from Tables S2-S4 by the subject- and week-specific creatinine values in this table.  Table S6  Fecal mutagenicity after consumption of the meal containing meat fried at low temperaturea | | | | | | | | | | |
|  |  | |  | |  |  |  |  |  |  |
| Sample ID: | **#1b** | |  | |  |  |  |  |  |  |
|  | Expt 1 | | |  | | Expt 2 |  |  | Expt 3 |  |
| µg EOM/plate | **U** | **H** | |  | | **U** | **H** |  | **U** | **H** |
| 0 | **62c** | **62** | |  | | **65** | **65** |  | **62** | **62** |
| 40 | **54** | **60** | |  | | **70** | **68** |  | **61** | **59** |
| 100 | **84** | **88** | |  | | **81** | **94** |  | **82** | **76** |
| 400 | **118** | 0 | |  | | **89** | **92** |  | 54 | **86** |
|  |  |  | |  | |  |  |  |  |  |
| Sample ID: | **#2** |  | |  | |  |  |  |  |  |
|  | Expt 1 |  | |  | | Expt 2 |  |  | Expt 3 |  |
|  | **U** | **H** | |  | | **U** | **H** |  | **U** | **H** |
| 0 | **60** | **60** | |  | | **59** | **59** |  | **55** | **55** |
| 40 | **45** | **61** | |  | | **60** | **54** |  | **73** | **67** |
| 100 | **65** | **104** | |  | | **78** | **85** |  | **86** | **82** |
| 400 | **93** | **88** | |  | | **90** | **83** |  | **125** | **104** |
|  |  |  | |  | |  |  |  |  |  |
| Sample ID: | **#3** |  | |  | |  |  |  |  |  |
|  | Expt 1 |  | |  | | Expt 2 |  |  | Expt 3 |  |
| µg EOM/plate | **U** | **H** | |  | | **U** | **H** |  | **U** | **H** |
| 0 | **60** | **60** | |  | | **59** | **59** |  | **55** | **55** |
| 40 | **65** | **59** | |  | | **56** | **68** |  | **68** | **55** |
| 100 | **98** | **92** | |  | | **99** | **101** |  | **101** | **119** |
| 400 | **125** | **91** | |  | | **136** | **101** |  | **135** | **119** |
|  |  |  | |  | |  |  |  |  |  |
| Sample ID: | **#4** |  | |  | |  |  |  |  |  |
|  | Expt 1 | | |  | | Expt 2 |  |  | Expt 3 |  |
| µg EOM/plate | **U** | **H** | |  | | **U** | **H** |  | **U** | **H** |
| 0 | **54** | **54** | |  | | **65** | **65** |  | **62** | **62** |
| 40 | **52d** | **72d** | |  | | **62d** | **54d** |  | **62** | **53** |
| 100 | **79d** | **103d** | |  | | **82d** | **116d** |  | **81** | **88** |
| 400 | **134d** | **150d** | |  | | **112d** | **120d** |  | **66** | **94** |
|  |  |  | |  | |  |  |  |  |  |
| Sample ID: | **#5** |  | |  | |  |  |  |  |  |
|  | Expt 1 |  | |  | | Expt 2 |  |  | Expt 3 |  |
| µg EOM/plate | **U** | **H** | |  | | **U** | **H** |  | **U** | **H** |
| 0 | **60** | **60** | |  | | **59** | **59** |  | **55** | **55** |
| 40 | **56** | **59** | |  | | **65** | **71** |  | **67** | **76** |
| 100 | **63** | **81** | |  | | **72** | **95** |  | **76** | **84** |
| 400 | 53 | **105** | |  | | 60 | 102 |  | **111** | 98 |
|  |  |  | |  | |  |  |  |  |  |
|  |  |  | |  | |  |  |  |  |  |
|  |  |  | |  | |  |  |  |  |  |
| Table S6 – continued  Fecal mutagenicity after consumption of the meal containing meat fried at low temperaturea | | | | | | | | | | |
|  |  |  | |  | |  |  |  |  |  |
| Sample ID: | **#6** |  | |  | |  |  |  |  |  |
|  | Expt 1 | | |  | | Expt 2 |  |  | Expt 3 |  |
| µg EOM/plate | **U** | **H** | |  | | **U** | **H** |  | **U** | **H** |
| 0 | **62** | **62** | |  | | **65** | **65** |  | **62** | **62** |
| 40 | **55** | **60** | |  | | **69d** | **67d** |  | **69** | **58** |
| 100 | **69** | **86** | |  | | **74d** | **67d** |  | **87** | **83** |
| 400 | 0 | 0 | |  | | **80d** | **112d** |  | **102** | **137** |
|  |  |  | |  | |  |  |  |  |  |
|  |  |  | |  | |  |  |  |  |  |
| Sample ID: | **#7** |  | |  | |  |  |  |  |  |
|  | Expt 1 |  | |  | | Expt 2 |  |  | Expt 3 |  |
| µg EOM/plate | **U** | **H** | |  | | **U** | **H** |  | **U** | **H** |
| 0 | **60** | **60** | |  | | **59** | **59** |  | **55** | **55** |
| 40 | **59** | **42** | |  | | **56** | **79** |  | **79** | **65** |
| 100 | **72** | **76** | |  | | **58** | **82** |  | **91** | **82** |
| 400 | **91** | **76** | |  | | **60** | **64** |  | **95** | **102** |
|  |  |  | |  | |  |  |  |  |  |
|  |  |  | |  | |  |  |  |  |  |
| Sample ID: | **#8** |  | |  | |  |  |  |  |  |
|  | Expt 1 |  | |  | | Expt 2 |  |  | Expt 3 |  |
| µg EOM/plate | **U** | **H** | |  | | **U** | **H** |  | **U** | **H** |
| 0 | **60** | **60** | |  | | **59** | **59** |  | **55** | **55** |
| 40 | **46** | **60** | |  | | **55** | **49** |  | **68** | **69** |
| 100 | **49** | **61** | |  | | **58** | **61** |  | **94** | **86** |
| 400 | 55 | **75** | |  | | **72** | **70** |  | **138** | **97** |

aBeef and sausage patties were cooked at 100°C for 10 min on each side.

bIndicates subject number. Subjects consumed diets containing meat cooked at either low or high temperature for 2-week periods in a cross-over design.

cCounts designated as within the linear portion of the dose-response curve are in bold type. These are the mean values for 2 plates/experiment except where noted. Each extract was tested in 3 independent experiments. Assays with the same zero dose mean count were conducted on the same day.

U = unhydrolyzed extracts H = acid-hydroylzed extracts

dExtracts tested in single plates.

| Table S7 | | | | | | | | |
| --- | --- | --- | --- | --- | --- | --- | --- | --- |
|  | |  |  |  |  |  |  |  |
| Fecal mutagenicity after consumption of the meal containing meat fried at high temperaturea | | | | | | | | |
|  |  |  |  |  |  |  |  |  |
| Sample ID: | **#1b** |  |  |  |  |  |  |  |
|  | Expt 1 |  |  | Expt 2 |  |  | Expt 3 |  |
| µg EOM/plate | **U** | **H** |  | **U** | **H** |  | **U** | **H** |
| 0 | **60c** | **60** |  | **59** | **59** |  | **55** | **55** |
| 40 | **61** | **64** |  | **61** | **63** |  | **63** | **71** |
| 100 | **82** | **94** |  | **86** | **110** |  | **102** | **107** |
| 400 | **97** | **146** |  | 96 | **143** |  | **115** | **140** |
|  |  |  |  |  |  |  |  |  |
| Sample ID: | **#2** |  |  |  |  |  |  |  |
|  | Expt 1 | |  | Expt 2 |  |  | Expt 3 |  |
| µg EOM/plate | **U** | **H** |  | **U** | **H** |  | **U** | **H** |
| 0 | **54** | **54** |  | **65** | **65** |  | **62** | **62** |
| 40 | **60d** | **75d** |  | **97d** | **66d** |  | **72** | **70** |
| 100 | **70d** | **131d** |  | **107d** | **173d** |  | **124** | **119** |
| 400 | **113d** | **216d** |  | **209d** | **192d** |  | **165** | **170** |
|  |  |  |  |  |  |  |  |  |
| Sample ID: | **#3** |  |  |  |  |  |  |  |
|  | Expt 1 |  |  | Expt 2 |  |  | Expt 3 |  |
| µg EOM/plate | **U** | **H** |  | **U** | **H** |  | **U** | **H** |
| 0 | **60** | **60** |  | **59** | **59** |  | **55** | **55** |
| 40 | **50** | **60** |  | **59** | **75** |  | **55** | **74** |
| 100 | **66** | **136** |  | **73** | **160** |  | **76** | **107** |
| 400 | **82** | 167 |  | **84** | 212 |  | **93** | 161 |
|  |  |  |  |  |  |  |  |  |
| Sample ID: | **#4** |  |  |  |  |  |  |  |
|  | Expt 1 |  |  | Expt 2 |  |  | Expt 3 |  |
| µg EOM/plate | **U** | **H** |  | **U** | **H** |  | **U** | **H** |
| 0 | **60** | **60** |  | **59** | **59** |  | **55** | **55** |
| 40 | **74** | **71** |  | **62** | **79** |  | **75** | **81** |
| 100 | **102** | **137** |  | **83** | **154** |  | **116** | **148** |
| 400 | 116 | 171 |  | **77** | 193 |  | 118 | 215 |
|  |  |  |  |  |  |  |  |  |
| Sample ID: | **#5** |  |  |  |  |  |  |  |
|  | Expt 1 |  |  | Expt 2 |  |  | Expt 3 |  |
| µg EOM/plate | **U** | **H** |  | **U** | **H** |  | **U** | **H** |
| 0 | **60** | **60** |  | **59** | **59** |  | **55** | **55** |
| 40 | **55** | **62** |  | **52** | **77** |  | **66** | **78** |
| 100 | **75** | **163** |  | **61** | **153** |  | **85** | **136** |
| 400 | **80** | 218 |  | **88** | 224 |  | **122** | 210 |
|  |  |  |  |  |  |  |  |  |
|  |  |  |  |  |  |  |  |  |
| Table S7 - continued | | | | | | | | |
| Sample ID: | **#6** |  |  |  |  |  |  |  |
|  | Expt 1 |  |  | Expt 2 |  |  | Expt 3 |  |
| µg EOM/plate | **U** | **H** |  | **U** | **H** |  | **U** | **H** |
| 0 | **60** | **60** |  | **59** | **59** |  | **55** | **55** |
| 40 | **52** | **69** |  | **68** | **66** |  | **72** | **73** |
| 100 | **59** | **109** |  | **73** | **130** |  | **58** | **119** |
| 400 | **63** | **185** |  | **87** | **210** |  | **127** | **166** |
|  |  |  |  |  |  |  |  |  |
| Sample ID: | **#7** |  |  |  |  |  |  |  |
|  | Expt 1 | |  |  |  |  |  |  |
| µg EOM/plate | **U** | **H** |  | **U** | **H** |  | **U** | **H** |
| 0 | **62** | **62** |  | **65** | **65** |  | **62** | **62** |
| 40 | **73** | **75** |  | **66d** | **100d** |  | **63** | **74** |
| 100 | **70** | **92** |  | **81d** | **130d** |  | **60** | **158** |
| 400 | **70** | 82 |  | **101d** | 220d |  | **94** | 197 |
|  |  |  |  |  |  |  |  |  |
| Sample ID: | **#8** |  |  |  |  |  |  |  |
|  | Expt 1 |  |  | Expt 2 |  |  | Expt 3 |  |
| µg EOM/plate | **U** | **H** |  | **U** | **H** |  | **U** | **H** |
| 0 | **60** | **60** |  | **59** | **59** |  | **55** | **55** |
| 40 | **53** | **45** |  | **65** | **71** |  | **66** | **79** |
| 100 | **52** | **115** |  | **74** | **139** |  | **95** | **141** |
| 400 | **58** | 151 |  | **91** | 176 |  | **97** | 179 |
|  |  |  |  |  |  |  |  |  |
| Sample ID: | **#9** |  |  |  |  |  |  |  |
|  | Expt 1 |  |  | Expt 2 |  |  | Expt 3 |  |
| µg EOM/plate | **U** | **H** |  | **U** | **H** |  | **U** | **H** |
| 0 | **60** | **60** |  | **59** | **59** |  | **55** | no data |
| 40 | **63** | **77** |  | **79** | **77** |  | **65** |  |
| 100 | **88** | **119** |  | **112** | **197** |  | **101** |  |
| 400 | **109** | 182 |  | 122 | 234 |  |  |  |
|  |  |  |  |  |  |  |  |  |
| Sample ID: | **#10** |  |  |  |  |  |  |  |
|  | Expt 1 |  |  | Expt 2 |  |  | Expt 3 |  |
| µg EOM/plate | **U** | **H** |  | **U** | **H** |  | **U** | **H** |
| 0 | **60** | **60** |  | **59** | **59** |  | **55** | **55** |
| 40 | **62** | **58** |  | **71** | **87** |  | **88** | **70** |
| 100 | **67** | **107** |  | **114** | **136** |  | **97** | **128** |
| 400 | **129** | 143 |  | 120 | 173 |  | 92 | 157 |
|  |  |  |  |  |  |  |  |  |
| Sample ID: | **#11** |  |  |  |  |  |  |  |
|  | Expt 1 |  |  | Expt 2 |  |  | Expt 3 |  |
| µg EOM/plate | **U** | **H** |  | **U** | **H** |  | **U** | **H** |
| 0 | **60** | **60** |  | **59** | **59** |  | **55** | **55** |
| 40 | **44** | **48** |  | **63** | **73** |  | **72** | **76** |
| 100 | **68** | **103** |  | **99** | **149** |  | **88** | **124** |
| 400 | **75** | **147** |  | **95** | 189 |  | **126** | 198 |
| Table S7 - continued | | | | | | | | |
|  |  |  |  |  |  |  |  |  |
| Sample ID: | **#12** |  |  |  |  |  |  |  |
|  | Expt 1 |  |  | Expt 2 |  |  | Expt 3 |  |
| µg EOM/plate | **U** | **H** |  | **U** | **H** |  | **U** | **H** |
| 0 | **60** | **60** |  | **59** | **59** |  | **55** | **55** |
| 40 | **40** | **56** |  | **66** | **69** |  | **76** | **94** |
| 100 | **61** | **102** |  | **77** | **81** |  | **76** | **118** |
| 400 | **58** | **140** |  | **92** | **191** |  | **66** | **152** |
|  |  |  |  |  |  |  |  |  |
| Sample ID: | **#13** |  |  |  |  |  |  |  |
|  | Expt 1 |  |  | Expt 2 |  |  | Expt 3 |  |
| µg EOM/plate | **U** | **H** |  | **U** | **H** |  | **U** | **H** |
| 0 | **60** | **60** |  | **59** | **59** |  | **55** | **55** |
| 40 | **51** | **62** |  | **55** | **53** |  | **69** | **141** |
| 100 | **99** | **143** |  | **87** | **115** |  | **112** | **87** |
| 400 | **122** | 202 |  | **82** | **190** |  | 124 | 192 |
|  |  |  |  |  |  |  |  |  |
| Sample ID: | **#14** |  |  |  |  |  |  |  |
|  | Expt 1 |  |  | Expt 2 |  |  | Expt 3 |  |
| µg EOM/plate | **U** | **H** |  | **U** | **H** |  | **U** | **H** |
| 0 | **60** | **60** |  | **59** | **59** |  | **55** | **55** |
| 40 | **53** | **52** |  | **70** | **85** |  | **80** | **73** |
| 100 | **63** | **139** |  | **81** | **176** |  | **95** | **109** |
| 400 | **71** | **230** |  | **126** | 214 |  | **142** | **202** |
|  |  |  |  |  |  |  |  |  |
| Sample ID: | **#15** |  |  |  |  |  |  |  |
|  | Expt 1 |  |  | Expt 2 |  |  | Expt 3 |  |
| µg EOM/plate | **U** | **H** |  | **U** | **H** |  | **U** | **H** |
| 0 | **60** | **60** |  | **59** | **59** |  | **55** | **55** |
| 40 | **39** | **66** |  | **70** | **50** |  | **70** | **74** |
| 100 | **63** | **140** |  | **165** | **80** |  | **105** | **151** |
| 400 | **60** | 172 |  | 224 | **84** |  | 131 | 167 |
|  |  |  |  |  |  |  |  |  |
| Sample ID: | **#16** |  |  |  |  |  |  |  |
|  | Expt 1 |  |  | Expt 2 |  |  | Expt 3 |  |
| µg EOM/plate | **U** | **H** |  | **U** | **H** |  | **U** | **H** |
| 0 | **60** | no data |  | **59** | **59** |  | **55** | **55** |
| 40 | **50** |  |  | **63** | **72** |  | **74** | **65** |
| 100 | **50** |  |  | **78** | **148** |  | **122** | **145** |
| 400 | **66** |  |  | **100** | 201 |  | 152 | 172 |

aBeef and sausage patties were cooked at 250°C for 11 min on each side.

bIndicates subject number. Subjects consumed diets containing meat cooked at either low or high temperature for 2-week periods in a cross-over design.

cCounts designated as within the linear portion of the dose-response curve are in bold type. These are mean values for 2 plates/experiment except where noted. Each extract was tested in 3 independent experiments.

dExtracts tested in single plates.

U = unhydrolyzed extracts H = acid-hydrolyzed extracts

| Table S8 | | | | | | | | |
| --- | --- | --- | --- | --- | --- | --- | --- | --- |
|  | |  |  |  |  |  |  |  |
| Fecal mutagenicity after consumption of the meal containing meat fried at high temperaturea together with dietary inhibitorsb | | | | | | | | |
|  |  |  |  |  |  |  |  |  |
| Sample ID: | **#9c** |  |  |  |  |  |  |  |
|  | Expt 1 |  |  | Expt 2 |  |  | Expt 3 |  |
| µg EOM/plate | **U** | **H** |  | **U** | **H** |  | **U** | **H** |
| 0 | **60d** | **60** |  | **59** | **59** |  | **55** | **55** |
| 40 | **64** | **46** |  | **65** | **63** |  | **66** | **77** |
| 100 | **71** | **106** |  | **88** | **151** |  | **110** | **173** |
| 400 | **86** | **207** |  | **92** | **287** |  | **112** | **235** |
|  |  |  |  |  |  |  |  |  |
| Sample ID: | **#10** |  |  |  |  |  |  |  |
|  | Expt 1 |  |  | Expt 2 |  |  | Expt 3 |  |
| µg EOM/plate | **U** | **H** |  | **U** | **H** |  | **U** | **H** |
| 0 | **60** | **60** |  | **59** | **59** |  | **55** | **55** |
| 40 | **54** | **67** |  | **65** | **73** |  | **61** | **79** |
| 100 | **77** | **108** |  | **98** | **119** |  | **96** | **98** |
| 400 | **97** | **144** |  | **119** | **188** |  | 93 | **127** |
|  |  |  |  |  |  |  |  |  |
| Sample ID: | **#11** |  |  |  |  |  |  |  |
|  | Expt 1 |  |  | Expt 2 |  |  | Expt 3 |  |
| µg EOM/plate | **U** | **H** |  | **U** | **H** |  | **U** | **H** |
| 0 | **60** | **60** |  | **59** | **59** |  | **55** | **55** |
| 40 | **48** | **61** |  | **44** | **52** |  | **76** | **72** |
| 100 | **76** | **53** |  | **72** | **122** |  | **83** | **130** |
| 400 | **80** | 132 |  | **70** | 157 |  | **96** | 165 |
|  |  |  |  |  |  |  |  |  |
| Sample ID: | **#12** |  |  |  |  |  |  |  |
|  | Expt 1 |  |  | Expt 2 |  |  | Expt 3 |  |
| µg EOM/plate | **U** | **H** |  | **U** | **H** |  | **U** | **H** |
| 0 | **60** | **60** |  | **59** | **59** |  | **55** | **55** |
| 40 | **58** | **67** |  | **64** | **68** |  | **66** | **82** |
| 100 | **75** | **92** |  | **72** | **117** |  | **72** | **140** |
| 400 | **73** | **214** |  | **73** | **176** |  | **84** | **232** |
|  |  |  |  |  |  |  |  |  |
| Sample ID: | **#13** |  |  |  |  |  |  |  |
|  | Expt 1 |  |  | Expt 2 |  |  | Expt 3 |  |
| µg EOM/plate | **U** | **H** |  | **U** | **H** |  | **U** | **H** |
| 0 | **60** | **60** |  | **59** | **59** |  | **55** | **55** |
| 40 | **59** | **60** |  | **65** | **68** |  | **63** | **79** |
| 100 | **55** | **121** |  | **77** | **123** |  | **69** | **102** |
| 400 | **61** | **137** |  | **82** | **182** |  | **102** | **136** |
|  |  |  |  |  |  |  |  |  |
|  |  |  |  |  |  |  |  |  |
| Table S8 – continued  Fecal mutagenicity after consumption of the meal containing meat fried at high temperaturea together with dietary inhibitorsb | | | | | | | | |
| Sample ID: | **#14** |  |  |  |  |  |  |  |
|  | Expt 1 |  |  | Expt 2 |  |  | Expt 3 |  |
| µg EOM/plate | **U** | **H** |  | **U** | **H** |  | **U** | **H** |
| 0 | **60** | **60** |  | **59** | **59** |  | **55** | **55** |
| 40 | **41** | **56** |  | **61** | **66** |  | **60** | **65** |
| 100 | **70** | **119** |  | **75** | **137** |  | **112** | **158** |
| 400 | **75** | **185** |  | 73 | **193** |  | **139** | 169 |
|  |  |  |  |  |  |  |  |  |
| Sample ID: | **#15** |  |  |  |  |  |  |  |
|  | Expt 1 |  |  | Expt 2 |  |  | Expt 3 |  |
| µg EOM/plate | **U** | **H** |  | **U** | **H** |  | **U** | **H** |
| 0 | **60** | **60** |  | **59** | **59** |  | **55** | **55** |
| 40 | **46** | **86** |  | **56** | **80** |  | **75** | **71** |
| 100 | **75** | **157** |  | **73** | **157** |  | **108** | **124** |
| 400 | **75** | **211** |  | 74 | 203 |  | **125** | **191** |
|  |  |  |  |  |  |  |  |  |
| Sample ID: | **#16** |  |  |  |  |  |  |  |
|  | Expt 1 |  |  | Expt 2 |  |  | Expt 3 |  |
| µg EOM/plate | **U** | **H** |  | **U** | **H** |  | **U** | **H** |
| 0 | **60** | **60** |  | **59** | **59** |  | **55** | **55** |
| 40 | **60** | **63** |  | **67** | **69** |  | **75** | **76** |
| 100 | **73** | **107** |  | **106** | **170** |  | **148** | **155** |
| 400 | **81** | **183** |  | 102 | 241 |  | 127 | 162 |

aBeef and sausage patties were cooked at 250°C for 11 min on each side.

bDietary inhibitors were cruciferous vegetables, yogurt, and chlorophyllin tablets.

cIndicates subject number. Subjects consumed diets containing meat cooked at high temperature alone or with inhibitors for 2-week periods in a cross-over design.

dCounts designated as within the linear portion of the dose-response curve are in bold type. These are mean values for 2 plates/experiment. Each extract was tested in 3 independent experiments.

U = unhydrolyzed extracts H = acid-hydroylzed extracts

Table S9

% Extractable organic matter (%EOM)a

| Sample ID: | Unhydrolyzed | Hydrolyzed | Sample ID: | Unhydrolyzed | Hydrolyzed |
| --- | --- | --- | --- | --- | --- |
| #1 week 2 | 9.70 | 10.48 | #9 week 2 | 6.80 | 6.42 |
| #1 week 4 | 5.65 | 5.98 | #9 week 4 | 6.11 | 5.48 |
| #2 week 2 | 8.52 | 8.53 | #10 week 2 | 11.31 | 12.46 |
| #2 week 4 | 7.43 | 8.80 | #10 week 4 | 9.30 | 9.87 |
| #3 week 2 | 9.13 | 7.50 | #11 week 2 | 11.53 | 12.37 |
| #3 week 4 | 7.58 | 7.28 | #11 week 4 | 10.49 | 10.19 |
| #4 week 2 | 5.55 | 5.91 | #12 week 2 | 8.50 | 8.52 |
| #4 week 4 | 5.58 | 7.04 | #12 week 4 | 10.01 | 12.74 |
| #5 week 2 | 7.06 | 8.41 | #13 week 2 | 8.84 | 8.32 |
| #5 week 4 | 7.40 | 7.83 | #13 week 4 | 9.00 | 8.84 |
| #6 week 2 | 5.89 | 8.70 | #14 week 2 | 10.36 | 9.73 |
| #6 week 4 | 11.25 | 9.12 | #14 week 4 | 8.31 | 9.70 |
| #7 week 2 | 6.68 | 5.72 | #15 week 2 | 9.84 | 9.32 |
| #7 week 4 | 7.29 | 6.89 | #15 week 4 | 10.13 | 10.66 |
| #8 week 2 | 9.03 | 7.84 | #16 week 2 | 8.75 | 9.55 |
| #8 week 4 | 7.83 | 9.28 | #16 week 4 | 8.69 | 9.31 |

aTo estimate mutagenic potency for feces as rev/mg lyophilized stool, we fit models using doses expressed in mg lyophilized stool. These doses were calculated by dividing the dose value in µg EOM/plate from Tables S6-S8 by subject- and week-specific %EOM values from this table expressed as a proportion (%EOM/100) and then dividing the result by 1000 to change µg to mg.

Table S10

Comet assay results for white blood cells expressed as tail moment (TM)

| **Sample ID:** | **Diet** | **Median TM**  **Week**  **1 2 3 4** | | | | **Mean** |  |
| --- | --- | --- | --- | --- | --- | --- | --- |
| #1a | LT | 0.51b | 0.33 |  |  | 0.42 |  |
|  | HT |  |  | 0.29 | 0.16 | 0.21 |  |
|  |  |  |  |  |  |  |  |
| #2 | LT |  |  | 0.30 | 0.11 | 0.21 |  |
|  | HT | 0.21 | 0.63 |  |  | 0.41 |  |
|  |  |  |  |  |  |  |  |
| #3 | LT | 0.23 | 0.48 |  |  | 0.35 |  |
|  | HT |  |  | 0.29 | 0.08 | 0.18 |  |
|  |  |  |  |  |  |  |  |
| #4 | LT |  |  | 0.23 | 0.16 | 0.20 |  |
|  | HT | 0.30 | 0.61 |  |  | 0.45 |  |
|  |  |  |  |  |  |  |  |
| #5 | LT | 0.85 | 1.06 |  |  | 0.95 |  |
|  | HT |  |  | 0.53 | 0.09 | 0.31 |  |
|  |  |  |  |  |  |  |  |
| #6 | LT | 1.36 | 1.82 |  |  | 1.59 |  |
|  | HT |  |  | 0.40 | 0.09 | 0.24 |  |
|  |  |  |  |  |  |  |  |
| #7 | LT |  |  | 0.35 | 0.09 | 0.22 |  |
|  | HT | 1.21 | 1.21 |  |  | 1.21 |  |
|  |  |  |  |  |  |  |  |
| #8 | LT |  |  | 0.84 | 0.16 | 0.50 |  |
|  | HT | 0.92 | 1.73 |  |  | 1.32 |  |
|  |  |  |  |  |  |  |  |
| #9 | HT | 0.06 | 0.40 |  |  | 0.23 |  |
|  | HT+I |  |  | 0.20 | 0.12 | 0.16 |  |
|  |  |  |  |  |  |  |  |
| #10 | HT | 0.07 | 0.38 |  |  | 0.23 |  |
|  | HT+I |  |  | 0.15 | 0.10 | 0.12 |  |
|  |  |  |  |  |  |  |  |
| #11 | HT |  |  | 0.15 | 0.12 | 0.14 |  |
|  | HT+I | 0.07 | 0.33 |  |  | 0.2 |  |
|  |  |  |  |  |  |  |  |
| #12 | HT |  |  | 0.18 | 0.19 | 0.19 |  |
|  | HT+I | 0.07 | 0.30 |  |  | 0.19 |  |
|  |  |  |  |  |  |  |  |
| #13 | HT | 0.14 | 0.13 |  |  | 0.13 |  |
|  | HT+I |  |  | 0.14 | 0.07 | 0.1 |  |
|  |  |  |  |  |  |  |  |
| #14 | HT | 0.11 | 0.16 |  |  | 0.13 |  |
|  | HT+I |  |  | 0.13 | 0.08 | 0.10 |  |
|  |  |  |  |  |  |  |  |
| #15 | HT | 0.14 | 0.05 |  |  | 0.09 |  |
|  | HT+I |  |  | 0.14 | 0.20 | 0.17 |  |
|  |  |  |  |  |  |  |  |
| #16 | HT |  |  | 0.12 | 0.05 | 0.08 |  |
|  | HT+I | 0.14 | 0.12 |  |  | 0.13 |  |

aindicates subject number. Subjects consumed diets containing meat cooked at either low (LT) or high temperature (HT) or the HT diet with inhibitors (HT+I) for 2-week periods in a cross-over design.

bAverage of 4 slide-specific medians, each based on 50 cells/slide (a total of 200 cells/week/subject).

Table S11

Comet assay results for rectal cells expressed as tail moment (TM)

| **Sample ID:** | **Diet** | **Median TM**  **Week**  **1 2 3 4** | | | | **Mean** |  |
| --- | --- | --- | --- | --- | --- | --- | --- |
| #1a | LT | 5.10b | 13.99 |  |  | 9.54 |  |
|  | HT |  |  | 14.32 | 11.45 | 12.88 |  |
|  |  |  |  |  |  |  |  |
| #2 | LT |  |  | 10.10 | 7.89 | 8.99 |  |
|  | HT | 7.79 | 6.64 |  |  | 9.76 |  |
|  |  |  |  |  |  |  |  |
| #3 | LT | 9.09 | 6.95 |  |  | 8.02 |  |
|  | HT |  |  | 10.87 | 5.97 | 9.38 |  |
|  |  |  |  |  |  |  |  |
| #4 | LT |  |  | 9.83 | 7.56 | 8.69 |  |
|  | HT | 20.17 | 5.88 |  |  | 13.02 |  |
|  |  |  |  |  |  |  |  |
| #5 | LT | 3.68 | 5.08 |  |  | 4.38 |  |
|  | HT |  |  | 13.35 | 7.78 | 10.56 |  |
|  |  |  |  |  |  |  |  |
| #6 | LT | 2.46 | 6.74 |  |  | 4.60 |  |
|  | HT |  |  | 2.70 | 2.42 | 2.56 |  |
|  |  |  |  |  |  |  |  |
| #7 | LT |  |  | 9.88 | 7.28 | 8.58 |  |
|  | HT | 3.72 | 11.00 |  |  | 7.36 |  |
|  |  |  |  |  |  |  |  |
| #8 | LT |  |  | 3.47 | 3.01 | 3.24 |  |
|  | HT | 5.58 | 8.70 |  |  | 7.14 |  |
|  |  |  |  |  |  |  |  |
| #9 | HT | 4.40 | 3.74 |  |  | 4.07 |  |
|  | HT+I |  |  | 1.87 | 2.10 | 1.99 |  |
|  |  |  |  |  |  |  |  |
| #10 | HT | 5.50 | 4.25 |  |  | 4.87 |  |
|  | HT+I |  |  | 3.03 | 2.24 | 2.63 |  |
|  |  |  |  |  |  |  |  |
| #11 | HT |  |  | 6.88 | 4.53 | 5.71 |  |
|  | HT+I | 12.08 | 4.74 |  |  | 8.41 |  |
|  |  |  |  |  |  |  |  |
| #12 | HT |  |  | 3.52 | 5.77 | 4.64 |  |
|  | HT+I | 3.08 | 2.21 |  |  | 2.64 |  |
|  |  |  |  |  |  |  |  |
| #13 | HT | 3.77 | 12.06 |  |  | 7.91 |  |
|  | HT+I |  |  | 2.37 | 2.10 | 2.23 |  |
|  |  |  |  |  |  |  |  |
| #14 | HT | 5.92 | 9.34 |  |  | 7.63 |  |
|  | HT+I |  |  | 1.64 | 2.55 | 2.10 |  |
|  |  |  |  |  |  |  |  |
| #15 | HT |  |  | 6.72 | 3.44 | 5.08 |  |
|  | HT+I | 1.05 | 1.51 |  |  | 1.28 |  |
|  |  |  |  |  |  |  |  |
| #16 | HT |  |  | 8.07 | 1.36 | 4.72 |  |
|  | HT+I | 1.30 | 5.51 |  |  | 3.41 |  |

aindicates subject number. Subjects consumed diets containing meat cooked at either low (LT) or high temperature (HT) or the HT diet with inhibitors (HT+I) for 2-week periods in a cross-over design.

bAverage of 4 slide-specific medians, each based on 50 cells/slide (a total of 200 cells/week/subject).
